# Supplementary material for: Unraveling the physiological responses of morphologically distinct corals to low oxygen
Source: PeerJ. 2024 Sep 23;12:e18095. doi: 10.7717/peerj.18095 (PMC11426318; doi:10.7717/peerj.18095)
Supplement: Supplemental Information 2 [file peerj-12-18095-s002.xlsx]

## Sheet: 1.DO in reef
DO recorded in coral reef June2021-Jan2022					DO recorded in coral reef Mar2022-June2022
#	Date	DO (mg L-1)			#	Date	DO (mg L-1)
3	2021-06-22	7.87			1	2022-03-05	8.06
4		6.69			2		6.2
5		6.93			3	2022-03-06	5.87
6		7.46			4		5.91
7		7.1			5	2022-03-07	6.44
8		7.29			6		5.96
9		7			7	2022-03-08	6.14
10		7.3			8		6.18
11		6.69			9	2022-03-09	6.69
12		7.27			10		6.57
13		7.41			11	2022-03-10	6.81
14		7.2			12		6.3
15		7.1			13	2022-03-11	6.62
16		7.19			14		7.05
17	2021-06-23	6.32			15	2022-03-12	6.65
18		7.16			16		7.33
19		6.9			17	2022-03-13	6.65
20		6.89			18		7.17
21		7.08			19	2022-03-14	5.65
22		6.78			20		6.91
23		6.92			21	2022-03-15	6.45
24		6.44			22		6.41
25		6.2			23	2022-03-16	4.73
26		6.41			24		6.77
27		6.71			25	2022-03-17	6.62
28		7.11			26		6.82
29		7.36			27	2022-03-18	6.69
30		7.6			28		6.64
31		7.66			29	2022-03-19	6.45
32		7.45			30		6.57
33		7.6			31	2022-03-20	5.71
34		7.57			32		6.67
35		7.45			33	2022-03-21	5.63
36		7.32			34		7.12
37		7.45			35	2022-03-22	6.35
38		6.97			36		7.12
39		7.41			37	2022-03-23	6.35
40		7.62			38		7.15
41	2021-06-24	7.33			39	2022-03-24	6.47
42		7.53			40		7.03
43		7.48			41	2022-03-25	6.16
44		7.6			42		7.07
45		7.32			43	2022-03-26	6.09
46		7.08			44		6.31
47		6.57			45	2022-03-27	5.91
48		6.7			46		5.29
49		6.67			47	2022-03-28	4.41
50		6.38			48		5.5
51		6.69			49	2022-03-29	3.89
52		6.84			50		5.48
53		7.14			51	2022-03-30	4.72
54		7.28			52		5.38
55		7.61			53	2022-03-31	4.97
56		7.55			54		5.22
57		7.13			55	2022-04-01	4.67
58		6.8			56		4.1
59		7.07			57	2022-04-02	3.67
60		6.8			58		5.17
61		6.38			59	2022-04-03	4.27
62		6.94			60		5.77
63		7.26			61	2022-04-04	5.9
64		7.22			62		5.81
65	2021-06-25	7.27			63	2022-04-05	6.07
66		7.48			64		5.85
67		7.45			65	2022-04-06	5.46
68		7.18			66		5.88
69		7.25			67	2022-04-07	5.52
70		7.12			68		6.49
71		7.1			69	2022-04-08	5.05
72		7.19			70		6.68
73		6.67			71	2022-04-09	6.45
74		7			72		6.79
75		6.98			73	2022-04-10	5.63
76		7.16			74		6.23
77		7.28			75	2022-04-11	4.59
78		7.61			76		6.69
79		7.48			77	2022-04-12	4.93
80		7.37			78		6.32
81		7.54			79	2022-04-13	5.17
82		7.41			80		6.67
83		7.48			81	2022-04-14	5.85
84		7.3			82		6.58
85		7.44			83	2022-04-15	5.98
86		7.25			84		7.01
87		7.21			85	2022-04-16	6.31
88		7.08			86		7.1
89	2021-06-26	7.18			87	2022-04-17	5.93
90		7.43			88		6.89
91		7.51			89	2022-04-18	6.36
92		7.27			90		6.29
93		7.16			91	2022-04-19	6.09
94		7.13			92		6.24
95		7.19			93	2022-04-20	5.4
96		6.79			94		6.17
97		7.2			95	2022-04-21	5.03
98		7.22			96		6.36
99		7.15			97	2022-04-22	5
100		7.31			98		3.43
101		7.22			99	2022-04-23	4.98
102		7.52			100		5.86
103		7.5			101	2022-04-24	5.19
104		7.6			102		5.75
105		7.25			103	2022-04-25	4.22
106		6.88			104		3.63
107		6.91			105	2022-04-26	3.39
108		7.03			106		4.97
109		6.98			107	2022-04-27	4.04
110		6.27			108		2.29
111		7.08			109	2022-04-28	3.33
112		7.12			110		4.21
113	2021-06-27	7.28			111	2022-04-29	4.51
114		7.1			112		4.83
115		7.2			113	2022-04-30	4.15
116		7.12			114		1.7
117		7.08			115	2022-05-01	2.56
118		7.01			116		4.38
119		7.04			117	2022-05-02	4.18
120		6.98			118		4.74
121		7.17			119	2022-05-03	3.78
122		7.16			120		4.12
123		7.53			121	2022-05-04	4.33
124		7.67			122		5.35
125		7.87			123	2022-05-05	5.39
126		7.75			124		5.91
127		7.84			125	2022-05-06	5.32
128		7.68			126		5.93
129		7.78			127	2022-05-07	4.93
130		7.97			128		6.46
131		7.78			129	2022-05-08	5.45
132		7.6			130		5.59
133		7.42			131	2022-05-09	4.05
134		7			132		6.17
135		6.89			133	2022-05-10	5.08
136		7.38			134		5.66
137	2021-06-28	7.33			135	2022-05-11	3.59
138		7.01			136		6.18
139		7.15			137	2022-05-12	6.17
140		7.21			138		6.34
141		7.23			139	2022-05-13	5.78
142		7.46			140		6.6
143		7.38			141	2022-05-14	5.28
144		7.29			142		7.18
145		7.32			143	2022-05-15	1.8
146		7.49			144		6.57
147		7.54			145	2022-05-16	5.5
148		8.16			146		6.42
149		8.06			147	2022-05-17	5.91
150		8.12			148		1.59
151		7.83			149	2022-05-18	5.95
152		7.75			150		4.74
153		7.62			151	2022-05-19	5.5
154		6.3			152		6.12
155		7.7			153	2022-05-20	5.01
156		7.34			154		5.42
157		7.06			155	2022-05-21	2.1
158		5.34			156		4.11
159		7			157	2022-05-22	4.52
160		6.55			158		4
161	2021-06-29	6.78			159	2022-05-23	3.74
162		7.19			160		5.1
163		6.99			161	2022-05-24	3.62
164		6.99			162		5.7
165		7.38			163	2022-05-25	5.03
166		7.27			164		6.13
167		7.43			165	2022-05-26	5
168		7.27			166		5.56
169		7.24			167	2022-05-27	3.52
170		7.28			168		5.53
171		7.33			169	2022-05-28	5.77
172		7.71			170		4.54
173		7.6			171	2022-05-29	4.63
174		7.66			172		4.67
175		7.75			173	2022-05-30	5.04
176		7.76			174		3.93
177		7.42			175	2022-05-31	4.42
178		7.44			176		3.47
179		7.52			177	2022-06-01	2.85
180		7.42			178		3.69
181		7.3			179	2022-06-02	3.84
182		7.24			180		3.22
183		7.07			181	2022-06-03	3.84
184		6.94			182		3.28
185	2021-06-30	4.88			183	2022-06-04	3.45
186		5.8			184		3.99
187		6.39			185	2022-06-05	3.44
188		6.16			186		3.39
189		7.27			187	2022-06-06	2.62
190		7.46			188		4.24
191		7.31			189	2022-06-07	2.88
192		7.34			190		3.08
193		7.47			191	2022-06-08	2.62
194		7.45			192		4.35
195		7.63			193	2022-06-09	3.11
196		7.7			194		3.51
197		7.95			195	2022-06-10	2.91
198		8.01			196		3.97
199		8.08			197	2022-06-11	3.29
200		8.59			198		3.66
201		8.16			199	2022-06-12	2.82
202		7.84			200		3.4
203		7.5			201	2022-06-13	3.66
204		7.46			202		3.18
205		7.3			203	2022-06-14	3.81
206		6.26			204		4.13
207		7.14			205	2022-06-15	4.39
208		5.46			206		3.41
209	2021-07-01	6.45			207	2022-06-16	3.43
210		6.54			208		4.28
211		6.72			209	2022-06-17	4.42
212		6.74			210		4.3
213		7			211	2022-06-18	4.7
214		7.06			212		4.46
215		7.13			213	2022-06-19	4.36
216		6.69			214		4
217		6.99			215	2022-06-20	4.11
218		6.9			216		4.15
219		7.33			217	2022-06-21	3.83
220		7.81			218		3.58
221		8.2			219	2022-06-22	2.87
222		8.16			220		4.06
223		8.19			221	2022-06-23	3.4
224		7.93			222		3.97
225		7.85			223	2022-06-24	4.1
226		7.58			224		3.89
227		7.12			225	2022-06-25	3.44
228		6.24			226		3.76
229		5.67			227	2022-06-26	3.8
230		6.97			228		3.94
231		6.86			229	2022-06-27	1.94
232		5.85			230		3.95
233	2021-07-02	5.48			231	2022-06-28	3.5
234		6.06			232		5.04
235		6.01			233	2022-06-29	4.42
236		6.53			234		5.75
237		6.86			235	2022-06-30	8.03
238		6.97			236		3.13
239		7.13
240		7.12
241		7.16
242		7.39
243		7.36
244		7.37
245		7.4
246		7.69
247		7.89
248		8.08
249		7.8
250		7.61
251		7.55
252		7.05
253		6.43
254		6.77
255		6.11
256		5.04
257	2021-07-03	5.98
258		6.68
259		6.1
260		5.99
261		6.4
262		7.17
263		7.26
264		7.11
265		7.42
266		7.43
267		7.59
268		7.78
269		7.86
270		7.93
271		8.16
272		8.34
273		8.12
274		7.51
275		7.48
276		7
277		6.58
278		6.97
279		6.5
280		6.87
281	2021-07-04	6.87
282		6.76
283		6.15
284		6.26
285		7.14
286		6.85
287		6.77
288		6.76
289		5.81
290		6.78
291		7.22
292		7.66
293		7.78
294		7.81
295		7.9
296		7.94
297		7.8
298		8.14
299		7.51
300		7.02
301		7.01
302		7.24
303		7.82
304		7.65
305	2021-07-05	7.08
306		7.03
307		7.11
308		7.08
309		6.9
310		6.94
311		6.93
312		6.84
313		6.74
314		7
315		7.15
316		6.98
317		7.5
318		7.55
319		7.59
320		7.27
321		7.45
322		7.37
323		7.3
324		6.92
325		6.95
326		6.98
327		6.95
328		7.31
329	2021-07-06	7.22
330		7.05
331		6.91
332		7.02
333		6.97
334		6.84
335		6.68
336		6.47
337		6.55
338		6.34
339		6.75
340		6.72
341		6.91
342		6.78
343		7.05
344		7.04
345		7.21
346		7
347		6.9
348		6.64
349		6.55
350		6.93
351		6.73
352		6.52
353	2021-07-07	6.53
354		6.56
355		6.37
356		6.21
357		6.54
358		6.44
359		5.7
360		5.36
361		3.91
362		4.14
363		4.7
364		5.73
365		6.31
366		6.32
367		6.46
368		6.63
369		6.17
370		6.74
371		6.55
372		6.02
373		5.68
374		6.04
375		5.7
376		5.82
377	2021-07-08	5.67
378		5.66
379		4.66
380		5.52
381		5.26
382		4.47
383		3.82
384		4.07
385		4.02
386		4.62
387		5.06
388		5.36
389		5.53
390		5.69
391		5.72
392		5.77
393		5.78
394		5.89
395		5.56
396		5.73
397		5.87
398		5.65
399		5.56
400		5.52
401	2021-07-09	5.4
402		5.22
403		5.01
404		5.17
405		5.07
406		4.97
407		5.04
408		4.44
409		4.44
410		4.63
411		4.62
412		4.76
413		4.94
414		4.89
415		4.87
416		4.83
417		4.8
418		4.84
419		4.92
420		4.87
421		3.95
422		4.75
423		4.83
424		4.9
425	2021-07-10	4.9
426		4.95
427		5
428		4.93
429		4.6
430		4.41
431		4.3
432		4.35
433		3.43
434		3.73
435		4.11
436		4.33
437		4.49
438		4.57
439		4.81
440		4.86
441		5.03
442		4.88
443		4.9
444		4.74
445		4.85
446		4.96
447		4.84
448		4.73
449	2021-07-11	4.92
450		4.92
451		4.87
452		4.82
453		4.87
454		4.74
455		4.54
456		4.46
457		4.55
458		4.27
459		4.08
460		4.27
461		4.2
462		4.04
463		3.77
464		4.11
465		4.28
466		4.24
467		4.22
468		4.24
469		4.22
470		4.15
471		3.15
472		2.79
473	2021-07-12	3.59
474		4.23
475		4.13
476		4.11
477		4.06
478		4.09
479		3.95
480		3.91
481		3.96
482		3.82
483		3.9
484		3.84
485		3.75
486		4.1
487		3.96
488		3.83
489		4.03
490		3.95
491		3.99
492		4.11
493		4.2
494		3.82
495		3.89
496		3.49
497	2021-07-13	3.82
498		3.75
499		3.52
500		3.42
501		3.49
502		3.52
503		3.62
504		3.65
505		3.63
506		3.68
507		3.53
508		3.35
509		3.2
510		3.34
511		3.32
512		3.29
513		3.44
514		3.56
515		3.48
516		3.46
517		3.59
518		3.57
519		3.29
520		2.7
521	2021-07-14	2.97
522		3.02
523		3.03
524		3.17
525		3.15
526		3.18
527		3.3
528		3.24
529		3.26
530		3.39
531		3.38
532		3.21
533		3.51
534		3.57
535		3.49
536		3.33
537		3.33
538		3.33
539		3.37
540		3.22
541		3.18
542		3.17
543		3.07
544		2.81
545	2021-07-15	3.07
546		3.04
547		2.97
548		3.15
549		3.2
550		3.08
551		3.18
552		3.13
553		3.07
554		3.07
555		3.11
556		3.11
557		3.22
558		3.66
559		3.71
560		3.57
561		3.75
562		3.69
563		3.68
564		3.46
565		3.5
566		3.57
567		3.57
568		3.06
569	2021-07-16	2.68
570		3.34
571		3.12
572		3.34
573		3.23
574		3.17
575		2.9
576		3.17
577		3.38
578		3.36
579		3.66
580		3.81
581		3.94
582		4.06
583		4.27
584		4.17
585		3.96
586		3.91
587		3.76
588		3.71
589		3.07
590		2.61
591		3.07
592		2.81
593	2021-07-17	2.96
594		2.91
595		2.81
596		2.82
597		2.82
598		2.88
599		2.71
600		2.75
601		2.79
602		3.26
603		3.28
604		3.46
605		7.63
606		8.01
607		7.76
608		7.52
609		7.49
610		7.44
611		7.26
612		7.22
613		7.21
614		7.24
615		7.15
616		6.94
617	2021-07-18	6.36
618		6.56
619		6.51
620		6.37
621		6.62
622		6.8
623		6.82
624		6.74
625		6.3
626		6.6
627		6.6
628		7.06
629		7.17
630		7.07
631		7.39
632		7.02
633		7.13
634		7.38
635		7.32
636		7.15
637		7.25
638		7.17
639		7.23
640		7.21
641	2021-07-19	7.45
642		7.18
643		6.99
644		6.64
645		7.09
646		6.67
647		6.55
648		6.14
649		5.95
650		5.57
651		6.33
652		6.38
653		6.9
654		6.69
655		7.12
656		7.14
657		7.12
658		6.9
659		6.95
660		7.08
661		6.9
662		6.97
663		6.99
664		6.88
665	2021-07-20	6.88
666		7.25
667		7.09
668		6.49
669		5.74
670		5.83
671		6.08
672		6.25
673		6.24
674		6.47
675		6.06
676		6.21
677		6.68
678		7.36
679		7.13
680		7.27
681		7.4
682		7.27
683		7.17
684		6.19
685		6.61
686		6.39
687		7.03
688		6.94
689	2021-07-21	7
690		6.82
691		6.76
692		6.56
693		6.54
694		6.12
695		5.68
696		6.08
697		5.63
698		5.52
699		6.07
700		6.04
701		6.27
702		6.47
703		6.31
704		6.15
705		5.86
706		5.88
707		5.76
708		5.69
709		5.82
710		6.13
711		5.83
712		5.68
713	2021-07-22	6.04
714		6.2
715		5.94
716		6.02
717		5.93
718		5.76
719		5.47
720		4.1
721		4.2
722		5.29
723		5.6
724		5.69
725		5.92
726		6.1
727		6.27
728		6.13
729		6.09
730		5.9
731		6.01
732		5.77
733		5.79
734		6.09
735		6.27
736		6.13
737	2021-07-23	5.98
738		5.95
739		6.01
740		5.91
741		5.89
742		5.86
743		5.52
744		5.51
745		5.75
746		5.74
747		5.87
748		5.45
749		5.71
750		5.95
751		6.07
752		6.01
753		6.1
754		6.04
755		6.04
756		6.02
757		6
758		6
759		5.72
760		5.98
761	2021-07-24	6
762		5.55
763		5.85
764		5.89
765		5.61
766		5.77
767		5.86
768		5.87
769		5.79
770		5.6
771		5.85
772		5.9
773		5.9
774		6.07
775		6.14
776		6.17
777		6.19
778		6.08
779		5.8
780		6.07
781		5.97
782		5.91
783		5.84
784		5.85
785	2021-07-25	5.65
786		5.89
787		5.97
788		5.79
789		5.73
790		5.68
791		5.35
792		5.56
793		5.53
794		4.83
795		5.12
796		5.33
797		5.63
798		5.89
799		5.93
800		6.07
801		6.17
802		5.81
803		5.64
804		5.47
805		5.46
806		5.28
807		4.63
808		5.31
809	2021-07-26	5.23
810		5.38
811		5.34
812		5.23
813		5.28
814		4.75
815		4.87
816		4.99
817		4.99
818		4.63
819		4.59
820		5.29
821		5.29
822		5.19
823		5.12
824		5.07
825		5.07
826		5.24
827		5.41
828		5.28
829		5.27
830		4.55
831		4.87
832		4.76
833	2021-07-27	4.59
834		4.4
835		4.3
836		4.21
837		4.05
838		4.11
839		4.64
840		4.6
841		4.46
842		4.34
843		4.09
844		4.67
845		4.84
846		4.87
847		5.17
848		5.16
849		5.11
850		4.99
851		5
852		4.89
853		4.75
854		4.54
855		4.63
856		4.18
857	2021-07-28	4.44
858		4.38
859		4.84
860		4.92
861		4.56
862		4.09
863		4.45
864		4.15
865		4.04
866		3.75
867		4.2
868		3.75
869		3.84
870		4.19
871		4.49
872		4.46
873		4.6
874		4.7
875		4.2
876		4.73
877		4.42
878		4.85
879		4.69
880		4.61
881	2021-07-29	4.68
882		4.81
883		5.02
884		4.56
885		4.01
886		3.99
887		4.05
888		4.38
889		4.36
890		4.43
891		4.52
892		4.46
893		4.6
894		4.69
895		4.75
896		4.69
897		4.64
898		4.77
899		4.73
900		4.75
901		4.87
902		4.48
903		4.32
904		4.92
905	2021-07-30	4.95
906		5.25
907		5.16
908		5.13
909		5.27
910		4.82
911		4.73
912		4.69
913		4.96
914		4.53
915		4.99
916		5.18
917		5.2
918		5.2
919		5.13
920		5.13
921		5.39
922		5.35
923		5.38
924		5.34
925		5.01
926		4.74
927		4.75
928		4.83
929	2021-07-31	4.37
930		4.73
931		4.86
932		3.51
933		5.24
934		4.71
935		4.53
936		4.89
937		5.2
938		5.3
939		5.63
940		5.62
941		5.79
942		5.81
943		5.65
944		5.57
945		5.4
946		5.31
947		5.36
948		4.41
949		5.07
950		5.21
951		5.29
952		5.05
953	2021-08-01	4.69
954		5.19
955		5.36
956		5.4
957		5.13
958		5.26
959		5.35
960		5.35
961		5.15
962		5.43
963		5.29
964		5.33
965		5.34
966		5.49
967		5.61
968		5.65
969		5.53
970		5.6
971		5.54
972		5.6
973		5.44
974		5.41
975		5.52
976		4.34
977	2021-08-02	4.03
978		3.28
979		3.3
980		3.06
981		3.13
982		2.55
983		4.05
984		4.05
985		4.33
986		4.44
987		4.7
988		4.62
989		4.88
990		5.56
991		5.57
992		5.7
993		5.64
994		5.48
995		5.43
996		4.81
997		5.01
998		5.07
999		5.51
1000		5.58
1001	2021-08-03	5.35
1002		4.73
1003		4.96
1004		4.77
1005		4.54
1006		3.78
1007		4.23
1008		3.51
1009		3.77
1010		4.94
1011		5.45
1012		5.4
1013		5.49
1014		5.51
1015		5.56
1016		5.46
1017		5.27
1018		5.1
1019		5.25
1020		5.4
1021		5.27
1022		5.23
1023		5.12
1024		4.88
1025	2021-08-04	4.9
1026		4.53
1027		5.05
1028		5.03
1029		4.91
1030		4.72
1031		4.59
1032		4.01
1033		4.25
1034		4.81
1035		5.08
1036		5.01
1037		5.1
1038		5.18
1039		5.35
1040		5.24
1041		5.02
1042		5.1
1043		5.22
1044		5.06
1045		5.31
1046		4.83
1047		4.72
1048		4.83
1049	2021-08-05	4.91
1050		4.93
1051		4.95
1052		4.81
1053		4.78
1054		4.74
1055		4.64
1056		3.93
1057		3.19
1058		3.13
1059		3.46
1060		4.58
1061		4.73
1062		4.94
1063		5.39
1064		5.52
1065		5.64
1066		5.54
1067		5.28
1068		5.03
1069		4.83
1070		4.77
1071		4.93
1072		4.99
1073	2021-08-06	4.99
1074		4.92
1075		4.93
1076		4.82
1077		4.75
1078		4.75
1079		4.51
1080		2.55
1081		3.27
1082		3.93
1083		3.99
1084		4.8
1085		4.88
1086		5.24
1087		5.38
1088		5.05
1089		4.91
1090		4.9
1091		4.61
1092		4.52
1093		4.46
1094		4.74
1095		4.88
1096		4.64
1097	2021-08-07	4.97
1098		4.98
1099		4.85
1100		4.85
1101		5.11
1102		4.75
1103		4.19
1104		3.93
1105		3.82
1106		4.19
1107		4.42
1108		4.81
1109		4.7
1110		4.93
1111		5.43
1112		5.66
1113		5.13
1114		4.83
1115		4.77
1116		4.24
1117		4.47
1118		4.61
1119		4.78
1120		4.8
1121	2021-08-08	4.7
1122		4.66
1123		4.54
1124		4.61
1125		4.41
1126		4.4
1127		4.5
1128		3.88
1129		3.75
1130		3.92
1131		4.65
1132		4.74
1133		4.84
1134		5
1135		5.6
1136		6.05
1137		5.07
1138		4.3
1139		5.52
1140		4.58
1141		4.58
1142		4.82
1143		4.8
1144		4.26
1145	2021-08-09	4.19
1146		4.24
1147		4.37
1148		4.42
1149		4.05
1150		4.19
1151		4.21
1152		4.32
1153		4.34
1154		4.35
1155		4.44
1156		4.44
1157		5.42
1158		5.31
1159		4.84
1160		5.26
1161		4.53
1162		4.53
1163		4.5
1164		4.58
1165		3.76
1166		3.86
1167		4.56
1168		4.77
1169	2021-08-10	4.84
1170		4.79
1171		4.57
1172		4.63
1173		4.57
1174		4.37
1175		4.45
1176		4.16
1177		4.61
1178		4.63
1179		5.01
1180		5.4
1181		6.5
1182		6.83
1183		5.69
1184		6.38
1185		5.82
1186		5.34
1187		4.73
1188		4.53
1189		4.72
1190		4.34
1191		3.65
1192		4.48
1193	2021-08-11	4.56
1194		4.77
1195		4.87
1196		4.65
1197		4.62
1198		4.56
1199		4.7
1200		4.78
1201		4.66
1202		4.81
1203		4.43
1204		4.7
1205		4.81
1206		5.03
1207		5.04
1208		4.78
1209		4.79
1210		4.84
1211		4.34
1212		4.58
1213		4.62
1214		4.4
1215		4.43
1216		4.26
1217	2021-08-12	4.24
1218		4.37
1219		4.5
1220		4.42
1221		4.48
1222		4.19
1223		4.22
1224		4.43
1225		4.32
1226		4.46
1227		4.49
1228		4.8
1229		4.6
1230		4.83
1231		4.95
1232		5.18
1233		4.69
1234		3.98
1235		3.32
1236		4.4
1237		4.42
1238		4.61
1239		4.48
1240		4.42
1241	2021-08-13	3.9
1242		3.81
1243		4.11
1244		3.13
1245		3.87
1246		4.35
1247		4.28
1248		2.88
1249		2.53
1250		3.08
1251		4.02
1252		4.08
1253		4.57
1254		5.62
1255		5.27
1256		3.01
1257		3.7
1258		4.48
1259		4.37
1260		4.74
1261		4.43
1262		4.29
1263		4.09
1264		4.04
1265	2021-08-14	2.81
1266		2.92
1267		3.31
1268		3.43
1269		3.64
1270		3.97
1271		3.31
1272		3.85
1273		4.14
1274		4.27
1275		4.47
1276		4.76
1277		4.81
1278		4.53
1279		5.14
1280		4.83
1281		4.19
1282		4.46
1283		4.16
1284		4.34
1285		3.92
1286		3.22
1287		2.93
1288		3.7
1289	2021-08-15	4.04
1290		3.99
1291		4.5
1292		4.3
1293		4.45
1294		4.43
1295		4.29
1296		3.56
1297		1.34
1298		1.85
1299		3.51
1300		3.69
1301		3.82
1302		4.42
1303		4.65
1304		4.76
1305		4.85
1306		4.39
1307		4.55
1308		4.49
1309		4.19
1310		4.79
1311		4.68
1312		4.41
1313	2021-08-16	4.08
1314		4.32
1315		4.53
1316		4.52
1317		4.32
1318		4.32
1319		3.69
1320		3.51
1321		4.45
1322		4.46
1323		4.22
1324		4.79
1325		4.85
1326		4.82
1327		4.82
1328		4.79
1329		5.06
1330		5.28
1331		5.26
1332		5.18
1333		5
1334		5.44
1335		5.14
1336		4.95
1337	2021-08-17	5.05
1338		5.29
1339		5.29
1340		5.03
1341		4.62
1342		4.74
1343		4.68
1344		5.23
1345		5.33
1346		5.46
1347		5.58
1348		5.81
1349		5.75
1350		5.68
1351		5.85
1352		5.81
1353		5.8
1354		5.58
1355		5.12
1356		4.98
1357		5.02
1358		5.11
1359		5.34
1360		5.17
1361	2021-08-18	4.85
1362		5.43
1363		5.37
1364		4.59
1365		4.85
1366		3.54
1367		4.33
1368		4.01
1369		4.52
1370		4.55
1371		4.63
1372		5.02
1373		5.16
1374		5.06
1375		5.09
1376		4.92
1377		4.98
1378		4.8
1379		4.87
1380		4.78
1381		4.57
1382		4.38
1383		4.29
1384		4.37
1385	2021-08-19	4.56
1386		4.7
1387		4.9
1388		4.69
1389		4.7
1390		4.65
1391		4.44
1392		4.32
1393		4.51
1394		4.39
1395		4.56
1396		4.59
1397		4.67
1398		4.39
1399		4.69
1400		4.81
1401		4.82
1402		4.82
1403		4.52
1404		4.39
1405		4.51
1406		4.47
1407		4.47
1408		4.44
1409	2021-08-20	4.67
1410		4.34
1411		4.7
1412		4.77
1413		4.67
1414		4.49
1415		4.68
1416		2.47
1417		2.79
1418		4.47
1419		4.39
1420		4.73
1421		4.71
1422		4.97
1423		4.71
1424		4.44
1425		4.5
1426		4.46
1427		4.66
1428		4.81
1429		4.69
1430		4.64
1431		4.52
1432		4.21
1433	2021-08-21	4.61
1434		4.53
1435		4.84
1436		4.52
1437		4.65
1438		4.52
1439		4.15
1440		2.62
1441		3.79
1442		4.35
1443		4.34
1444		4.77
1445		4.76
1446		5.02
1447		4.6
1448		4.7
1449		4.58
1450		4.92
1451		4.13
1452		4.11
1453		4.76
1454		4.22
1455		3.62
1456		4.17
1457	2021-08-22	4.21
1458		4.18
1459		4.34
1460		4.51
1461		4.55
1462		4.49
1463		3.92
1464		3.85
1465		3.61
1466		4.24
1467		4.66
1468		5
1469		5.09
1470		5.32
1471		5.28
1472		5.29
1473		5.34
1474		5.06
1475		5.36
1476		5.29
1477		4.78
1478		4.4
1479		4.88
1480		4.79
1481	2021-08-23	5.05
1482		5.03
1483		4.64
1484		4.86
1485		4.85
1486		4.47
1487		4.64
1488		4.53
1489		4.58
1490		4.63
1491		4.66
1492		4.64
1493		4.94
1494		5
1495		4.94
1496		4.94
1497		4.82
1498		4.81
1499		4.53
1500		4.66
1501		3.76
1502		4.73
1503		4.77
1504		4.51
1505	2021-08-24	5.12
1506		4.92
1507		5
1508		4.81
1509		4.69
1510		4.74
1511		4.55
1512		4.67
1513		4.6
1514		4.72
1515		4.73
1516		4.77
1517		4.61
1518		5.03
1519		4.84
1520		5.05
1521		5.04
1522		3.59
1523		3.45
1524		3.89
1525		4.19
1526		4.28
1527		3.99
1528		4.27
1529	2021-08-25	4.37
1530		4.47
1531		4.26
1532		4.3
1533		3.71
1534		3.59
1535		3.81
1536		2.78
1537		1.98
1538		2.04
1539		1.75
1540		2.41
1541		2.74
1542		3.42
1543		3.67
1544		2.99
1545		3.43
1546		3.54
1547		3.48
1548		3.76
1549		2.82
1550		2.86
1551		2.86
1552		3.36
1553	2021-08-26	3.03
1554		3.99
1555		3.91
1556		3.67
1557		3.53
1558		3.35
1559		3.65
1560		3.72
1561		3.54
1562		3.38
1563		3.42
1564		3.62
1565		3.52
1566		3.95
1567		3.98
1568		4.05
1569		4.32
1570		4.53
1571		3.71
1572		4.1
1573		2.93
1574		4.01
1575		3.29
1576		3.06
1577	2021-08-27	3.57
1578		2.97
1579		2.95
1580		3.27
1581		3.86
1582		3.6
1583		2.85
1584		1.97
1585		1.95
1586		0.88
1587		1.14
1588		3.42
1589		3.59
1590		3.77
1591		4.34
1592		4.53
1593		4.62
1594		4.48
1595		4.47
1596		4.42
1597		3.85
1598		3.73
1599		3.98
1600		4.14
1601	2021-08-28	3.29
1602		2.68
1603		3.06
1604		1.96
1605		1.72
1606		2.14
1607		1.77
1608		2.46
1609		3.17
1610		3.57
1611		4.48
1612		4.26
1613		4.39
1614		4.49
1615		4.96
1616		5.18
1617		4.68
1618		5.04
1619		4.52
1620		4.97
1621		4.81
1622		4.79
1623		4.76
1624		2.86
1625	2021-08-29	2.74
1626		2.86
1627		3.22
1628		3.61
1629		4.03
1630		3.18
1631		2.39
1632		2.3
1633		3.04
1634		3.44
1635		4.05
1636		3.72
1637		4.12
1638		4.52
1639		4.58
1640		4.77
1641		4.35
1642		3.78
1643		3.91
1644		3.69
1645		3.84
1646		3.34
1647		2.87
1648		2.4
1649	2021-08-30	1.89
1650		3.06
1651		2.52
1652		2.9
1653		2.98
1654		2.37
1655		2.41
1656		2.77
1657		2.81
1658		3.09
1659		3.59
1660		3.87
1661		4.1
1662		4.7
1663		4.68
1664		4.65
1665		4.34
1666		3.57
1667		3.13
1668		3.82
1669		3.96
1670		3.81
1671		3.54
1672		3.68
1673	2021-08-31	2.88
1674		2.71
1675		2.87
1676		2.74
1677		3.4
1678		2.3
1679		2.14
1680		1.27
1681		1.54
1682		2.12
1683		1.65
1684		2.23
1685		2.68
1686		2.95
1687		2.88
1688		3.65
1689		3.41
1690		3.03
1691		3.68
1692		3.81
1693		3.76
1694		3.57
1695		3.67
1696		4.02
1697	2021-09-01	3.94
1698		3.77
1699		3.55
1700		2.96
1701		2.95
1702		3.42
1703		2.21
1704		2.46
1705		3.04
1706		4.08
1707		4.03
1708		4.01
1709		4.33
1710		4.33
1711		4.39
1712		4.24
1713		4.26
1714		4.21
1715		4.17
1716		3.76
1717		3.61
1718		3.23
1719		2.77
1720		3.18
1721	2021-09-02	3.35
1722		3.84
1723		3.71
1724		3.34
1725		3.26
1726		3.06
1727		3.26
1728		3.15
1729		3.27
1730		3.51
1731		3.61
1732		3.87
1733		3.71
1734		4.01
1735		3.91
1736		3.84
1737		3.64
1738		3.54
1739		3.58
1740		3.29
1741		3.57
1742		3.52
1743		3.58
1744		3.49
1745	2021-09-03	3.1
1746		3.23
1747		3.43
1748		3.33
1749		3.07
1750		2.08
1751		2.18
1752		2.13
1753		2.98
1754		2.66
1755		2.7
1756		3.41
1757		2.86
1758		3.54
1759		3.75
1760		4.08
1761		3.82
1762		3.68
1763		3.55
1764		3.97
1765		3.76
1766		3.98
1767		3.7
1768		3.92
1769	2021-09-04	3.78
1770		3.76
1771		3.7
1772		3.7
1773		3.83
1774		3.45
1775		3.04
1776		1.96
1777		3.92
1778		3.95
1779		3.73
1780		3.72
1781		3.84
1782		4.27
1783		4.29
1784		4.21
1785		4.19
1786		4.31
1787		4.29
1788		3.99
1789		4.09
1790		4.18
1791		4.12
1792		4.21
1793	2021-09-05	4.14
1794		4.1
1795		4.07
1796		3.88
1797		3.96
1798		3.96
1799		3.82
1800		3.7
1801		1.95
1802		3.53
1803		3.53
1804		4.04
1805		4.17
1806		4.12
1807		4.59
1808		4.51
1809		4.35
1810		4.31
1811		4.19
1812		3.47
1813		3.38
1814		3.57
1815		3.67
1816		3.51
1817	2021-09-06	3.13
1818		3.5
1819		3.4
1820		3.73
1821		4.2
1822		4.36
1823		4.24
1824		2.47
1825		3.32
1826		2.92
1827		3.78
1828		4.12
1829		4.23
1830		4.77
1831		4.82
1832		4.86
1833		4.66
1834		4.43
1835		4.3
1836		4.59
1837		4.52
1838		3.95
1839		4.24
1840		4.62
1841	2021-09-07	4.53
1842		3.1
1843		3.47
1844		3.06
1845		4.17
1846		5.01
1847		4.75
1848		4.46
1849		4.45
1850		4.54
1851		4.7
1852		4.93
1853		4.93
1854		5.09
1855		4.82
1856		4.84
1857		4.55
1858		4.67
1859		4.65
1860		4.66
1861		2.08
1862		3.77
1863		3.49
1864		4.48
1865	2021-09-08	4.36
1866		4.95
1867		5.08
1868		5.07
1869		4.92
1870		4.76
1871		2.52
1872		2.35
1873		2.37
1874		2.34
1875		2.13
1876		2.54
1877		2.29
1878		2.12
1879		2.33
1880		2.31
1881		1.97
1882		2.05
1883		2.53
1884		1.99
1885		2.24
1886		1.74
1887		2.23
1888		2.26
1889	2021-09-09	2.15
1890		2.02
1891		2.49
1892		2.93
1893		2.26
1894		1.9
1895		3.14
1896		4.23
1897		4.14
1898		4.09
1899		4.22
1900		4.51
1901		4.27
1902		4.18
1903		4.49
1904		4.43
1905		4.39
1906		4.11
1907		4.01
1908		4.16
1909		3.6
1910		1.74
1911		3.24
1912		3.46
1913	2021-09-10	3.71
1914		3.76
1915		3.03
1916		3.56
1917		2.38
1918		3.56
1919		3.83
1920		2.66
1921		3.26
1922		3.49
1923		3.77
1924		4.12
1925		4.15
1926		4.08
1927		3.95
1928		3.37
1929		2.74
1930		2.93
1931		3.33
1932		3.85
1933		3.31
1934		3.45
1935		3.36
1936		3.52
1937	2021-09-11	2.39
1938		2.44
1939		2.19
1940		2.12
1941		2.45
1942		3.13
1943		2.77
1944		1.72
1945		3.39
1946		3.73
1947		3.72
1948		4.04
1949		4.16
1950		4.19
1951		4.05
1952		4.18
1953		4.19
1954		3.26
1955		3.65
1956		3.75
1957		3.48
1958		3.19
1959		3.14
1960		3.11
1961	2021-09-12	4.02
1962		3.52
1963		3.45
1964		3.22
1965		3.26
1966		3.32
1967		3.27
1968		2.82
1969		3.22
1970		3.92
1971		3.81
1972		4.16
1973		4.16
1974		4.23
1975		3.67
1976		3.92
1977		3.89
1978		4.09
1979		4
1980		3.9
1981		3.47
1982		3.42
1983		3.37
1984		2.88
1985	2021-09-13	2.66
1986		2.49
1987		2.51
1988		2.47
1989		2.9
1990		3.15
1991		3.23
1992		3.26
1993		3.49
1994		3.78
1995		3.72
1996		3.5
1997		3.54
1998		3.48
1999		3.01
2000		2.99
[truncated: 3,090 more rows]

## Sheet: 2.DO in experiment
DO in experiment: DO recorded along experiment for 3 species of corals, P. acuta, P. lutea and T. mesenterina
Pocillopora acuta	Replicate	0h	12h	12h	24h		Porites lutea	Replicate	0h	12h	12h	24h	24h	36h	36h	48h	48h	60h	60h	72h		Turbinaria mesenterina	Replicate	0h	12h	12h	24h	24h	36h	36h	48h	48h	60h	60h	72h
Ambient	1	6.6	4.13	5.89	4.8		Ambient	1	6.39	3.7	5.97	7.6	6.2	3.58	5.41	5.87	5.81	3.3	5.11	5.8		Ambient	1	6.57	4.46	6.2	6.45	6.3	4.95	6.07	6.66	6.29	5.41	5.8	6.5
Ambient	2	6.55	4.38	5.9	4.65		Ambient	2	6.4	3.92	6.01	7.72	5.95	4.09	5.56	7.44	5.88	3.7	5.76	7.45		Ambient	2	6.52	4.42	6.19	6.53	6.29	4.44	6.01	6.26	6.28	4.37	5.81	6.25
Ambient	3	6.56	4.39	5.9	5.82		Ambient	3	6.35	4.3	6.03	6.88	5.88	3.63	5.59	5.94	5.9	3.43	5.79	6.56		Ambient	3	6.48	3.35	6.19	6.35	6.12	3.03	6.08	6.26	6.04	2.88	5.79	5.96
Ambient	4	6.52	3.64	5.88	3.87		Ambient	4	6.2	4.23	6.05	7.62	6.03	3.5	5.48	7.2	5.72	3.21	5.79	6.66		Ambient	4	6.54	5.44	6.19	6.44	6.16	4.28	6.08	6.31	6.2	4.69	5.8	6.04
Ambient	5	6.48	3.75	5.84	5.41		Ambient	5	6.16	3.09	6.07	6.68	6.09	3.18	5.47	6.98	5.59	3.07	5.8	6.28		Ambient	5	6.55	3	6.18	7.2	6.19	4.66	6.11	6.35	6.22	2.3	5.77	6.22
Ambient	6	6.48	3.74	5.83	3.83		Ambient	6	6.26	4.17	6.07	7.9	6.04	4	5.67	6.94	5.87	4.02	5.79	6.86		Ambient	6	6.52	2.69	6.19	7.43	6.15	2.89	6.13	6.87	6.17	3.46	5.8	6.44
Ambient	7	6.51	3.94	5.86	5.48		Ambient	7	6.37	2.92	6.09	7.97	5.96	2.66	5.61	6.55	5.79	2.83	5.8	6.85		Ambient	7	6.49	3.15	6.08	7.7	6.14	3.63	5.89	6.87	6.19	3.32	5.8	6.7
Ambient	8	6.43	4.08	5.91	5.99		Ambient	8	6.39	3.45	6.1	7.98	5.99	3.26	5.58	5.98	5.79	3.14	5.79	6.37		Ambient	8	6.52	3.15	6.18	6.53	6.14	3.06	5.86	6.54	6.15	3.23	5.71	6.25
Hypoxia	1	1.63	1.31	1.78	0.681		Hypoxia	1	1.85	1.62	1.96	5.37	1.81	1.18	1.97	4.36	2.18	1.41	2.13	4.09		Hypoxia	1	1.91	1.39	2.38	3.91	1.82	1.05	2.2	4.28	1.65	1.2	1.81	2.69
Hypoxia	2	1.75	1.63	1.75	2.82		Hypoxia	2	1.86	1.46	1.99	3.48	1.92	1.51	1.99	3.68	2.1	1.47	2.03	4.36		Hypoxia	2	1.87	1.53	2.35	4.21	1.77	1.39	2.25	4.16	1.71	1.37	1.85	2.87
Hypoxia	3	1.61	1.44	1.71	0.44		Hypoxia	3	1.83	0.905	2.05	3.84	1.86	1.02	1.9	2.78	1.88	0.972	2	3.78		Hypoxia	3	1.93	1.49	2.38	3.26	1.82	1.4	2.12	3.38	1.71	1.51	2.02	2.95
Hypoxia	4	1.61	1.48	1.71	0.395		Hypoxia	4	1.82	1.4	2.09	4.01	1.95	1.2	1.96	4.19	1.93	1.12	2	3.75		Hypoxia	4	1.95	1.55	2.4	3.53	1.76	1.21	2.23	3.34	2.06	1.75	1.82	2.76
Hypoxia	5	1.67	1.48	1.65	1.17		Hypoxia	5	1.87	1.11	2.09	3.11	2.06	0.828	2.04	3.3	1.92	0.708	1.94	3.28		Hypoxia	5	1.93	1.31	2.33	6.8	2.13	0.804	1.83	3.48	1.45	1.1	1.9	4.5
Hypoxia	6	1.7	1.41	1.73	1.45		Hypoxia	6	1.92	1.14	2.11	4.62	2.05	1.3	2.06	4.91	1.76	1.07	1.94	4.27		Hypoxia	6	1.98	1.39	2.35	4.12	1.67	0.952	1.86	3.38	1.45	1.16	1.85	3.58
Hypoxia	7	2.11	1.62	1.85	2.66		Hypoxia	7	1.98	0.66	2.16	2.83	1.91	0.414	2.09	3.03	1.71	0.524	1.96	3.76		Hypoxia	7	2.09	1.45	2.3	4.29	1.67	0.9	1.92	3.32	1.52	1.07	1.82	3.45
Hypoxia	8	2.11	1.28	1.79	3.53		Hypoxia	8	2.05	0.954	2.15	4.34	1.94	0.969	2.01	3.89	1.91	0.856	1.94	3.37		Hypoxia	8	2.22	1.52	2.17	6.72	1.8	1.14	1.9	5.09	1.61	1.15	1.92	5.08
Anoxia	1	0.214	0.34	0.176	0.119		Anoxia	1	0.091	0.469	0.094	2.06	0.343	0.478	0.114	2.18	0.155	0.461	0.289	2.94		Anoxia	1	0.124	0.693	0.23	3.84	0.199	0.56	0.25	2.44	0.198	0.756	0.257	2.66
Anoxia	2	0.211	0.236	0.199	0.129		Anoxia	2	0.093	0.531	0.109	3.3	0.306	0.537	0.129	2.62	0.191	0.424	0.291	3.37		Anoxia	2	0.13	0.837	0.22	4.15	0.197	0.479	0.224	2.08	0.18	0.835	0.28	1.35
Anoxia	3	0.235	0.265	0.195	0.082		Anoxia	3	0.096	0.803	0.118	1.71	0.31	0.849	0.119	1.88	0.201	0.731	0.28	2.17		Anoxia	3	0.153	0.648	0.206	5.28	0.221	0.393	0.214	2.6	0.17	0.587	0.301	2.46
Anoxia	4	0.279	0.568	0.208	0.078		Anoxia	4	0.145	0.677	0.125	3.05	0.345	0.397	0.149	3.6	0.193	0.472	0.26	3.01		Anoxia	4	0.173	0.688	0.207	2.77	0.242	0.568	0.208	1.85	0.186	0.584	0.315	1.78
Anoxia	5	0.267	0.277	0.195	0.106		Anoxia	5	0.2	0.6	0.125	2.16	0.34	0.647	0.117	2	0.199	0.502	0.287	2.28		Anoxia	5	0.173	0.63	0.207	3.85	0.252	0.215	0.207	2.45	0.216	0.412	0.319	1.26
Anoxia	6	0.303	0.184	0.193	0.094		Anoxia	6	0.22	0.577	0.136	3.92	0.322	0.499	0.13	3.26	0.214	0.278	0.273	3.47		Anoxia	6	0.167	0.592	0.218	5.06	0.265	0.238	0.243	3.84	0.211	0.49	0.326	2.58
Anoxia	7	0.397	0.244	0.203	0.111		Anoxia	7	0.244	0.63	0.149	5.01	0.363	0.466	0.135	4.17	0.279	0.388	0.274	4.6		Anoxia	7	0.181	0.556	0.27	4.44	0.254	0.299	0.252	3.76	0.209	0.332	0.307	2.5
Anoxia	8	0.445	0.335	0.186	0.105		Anoxia	8	0.254	0.508	0.167	3.47	0.404	0.398	0.137	3.98	0.278	0.285	0.345	5.01		Anoxia	8	0.226	0.556	0.286	3.88	0.306	0.359	0.268	2.33	0.206	0.349	0.319	1.54

## Sheet: 3.MQY
MQY: the maximum quantum yield (MQY) measured in experiment for 3 species of corals, P. acuta, P. lutea and T. mesenterina
Pocillopora acuta	Treatment	Rep	0h	12h	24h		Porites lutea	Treatment	Rep	0h	12h	24h	36h	48h	60h	72h		Turbinaria mesenterina	Treatment	Rep	0h	12h	24h	36h	48h	60h	72h
	Ambient	1	0.712	0.728	0.762			Ambient	1	0.675	0.694	0.684	0.673	0.636	0.685	0.643			Ambient	1	0.701	0.69	0.711	0.607	0.666	0.605	0.61
	Ambient	2	0.751	0.728	0.727			Ambient	2	0.686	0.65	0.67	0.658	0.66	0.658	0.615			Ambient	2	0.689	0.738	0.613	0.678	0.656	0.665	0.584
	Ambient	3	0.726	0.717	0.754			Ambient	3	0.699	0.709	0.68	0.674	0.659	0.669	0.635			Ambient	3	0.697	0.682	0.686	0.643	0.7	0.667	0.658
	Ambient	4	0.709	0.715	0.73			Ambient	4	0.675	0.665	0.692	0.654	0.624	0.392	0.673			Ambient	4	0.667	0.515	0.699	0.718	0.696	0.646	0.668
	Ambient	5	0.715	0.749	0.724			Ambient	5	0.671	0.693	0.661	0.656	0.672	0.617	0.688			Ambient	5	0.682	0.645	0.678	0.562	0.677	0.632	0.662
	Ambient	6	0.766	0.717	0.737			Ambient	6	0.66	0.701	0.709	0.665	0.6	0.638	0.655			Ambient	6	0.37	0.634	0.663	0.665	0.692	0.637	0.635
	Ambient	7	0.726	0.744	0.691			Ambient	7	0.684	0.683	0.634	0.674	0.699	0.683	0.662			Ambient	7	0.684	0.649	0.652	0.609	0.625	0.674	0.667
	Ambient	8	0.736	0.742	0.746			Ambient	8	0.654	0.691	0.707	0.658	0.675	0.684	0.676			Ambient	8	0.671	0.667	0.677	0.664	0.702	0.643	0.682
	Hypoxia	1	0.705	0.707	0.483			Hypoxia	1	0.68	0.702	0.73	0.568	0.634	0.605	0.691			Hypoxia	1	0.69	0.592	0.545	0.536	0.535	0.596	0.56
	Hypoxia	2	0.75	0.662	0.638			Hypoxia	2	0.66	0.617	0.642	0.677	0.57	0.465	0.651			Hypoxia	2	0.678	0.576	0.568	0.461	0.6	0.528	0.592
	Hypoxia	3	0.733	0.601	0.314			Hypoxia	3	0.702	0.703	0.673	0.462	0.524	0.378	0.586			Hypoxia	3	0.655	0.623	0.657	0.46	0.501	0.558	0.643
	Hypoxia	4	0.717	0.664	0.367			Hypoxia	4	0.64	0.625	0.608	0.59	0.642	0.527	0.515			Hypoxia	4	0.678	0.598	0.599	0.535	0.651	0.557	0.654
	Hypoxia	5	0.74	0.747	0.414			Hypoxia	5	0.629	0.538	0.669	0.662	0.697	0.384	0.678			Hypoxia	5	0.673	0.689	0.532	0.547	0.622	0.589	0.665
	Hypoxia	6	0.701	0.7	0.452			Hypoxia	6	0.675	0.6	0.586	0.568	0.643	0.59	0.493			Hypoxia	6	0.696	0.465	0.554	0.569	0.668	0.628	0.588
	Hypoxia	7	0.628	0.682	0.684			Hypoxia	7	0.723	0.589	0.71	0.665	0.66	0.534	0.684			Hypoxia	7	0.679	0.617	0.581	0.534	0.652	0.635	0.598
	Hypoxia	8	0.707	0.676	0.5			Hypoxia	8	0.682	0.504	0.639	0.636	0.64	0.648	0.628			Hypoxia	8	0.676	0.705	0.676	0.553	0.612	0.585	0.668
	Anoxia	1	0.76	0.597	0			Anoxia	1	0.752	0.678	0.72	0.552	0.604	0.372	0.627			Anoxia	1	0.685	0.511	0.688	0.456	0.671	0.594	0.679
	Anoxia	2	0.734	0.62	0			Anoxia	2	0.677	0.667	0.694	0.637	0.656	0.312	0.699			Anoxia	2	0.66	0.48	0.638	0.402	0.562	0.43	0.578
	Anoxia	3	0.718	0.543	0			Anoxia	3	0.687	0.62	0.681	0.444	0.628	0.466	0.62			Anoxia	3	0.683	0.398	0.62	0.368	0.551	0.428	0.623
	Anoxia	4	0.723	0.626	0			Anoxia	4	0.662	0.508	0.751	0.67	0.66	0.507	0.672			Anoxia	4	0.667	0.399	0.647	0.599	0.686	0.411	0.659
	Anoxia	5	0.739	0.666	0			Anoxia	5	0.676	0.413	0.67	0.514	0.701	0.48	0.61			Anoxia	5	0.678	0.374	0.563	0.391	0.562	0.453	0.591
	Anoxia	6	0.716	0.7	0			Anoxia	6	0.736	0.56	0.671	0.381	0.645	0.393	0.639			Anoxia	6	0.681	0.54	0.577	0.407	0.52	0.481	0.633
	Anoxia	7	0.742	0.506	0			Anoxia	7	0.695	0.417	0.63	0.518	0.624	0.307	0.56			Anoxia	7	0.691	0.458	0.646	0.45	0.578	0.556	0.58
	Anoxia	8	0.741	0.624	0			Anoxia	8	0.679	0.646	0.644	0.366	0.653	0.458	0.619			Anoxia	8	0.621	0.413	0.634	0.394	0.568	0.514	0.587

## Sheet: 4.Surface area
Surface area: coral's surface area from paraffin wax method for 3 species of corals, P. acuta, P. lutea and T. mesenterina
Treatment		P. acuta (cm2)	P. lutea (cm2)	T. mesenterina(cm2)
Ambient	1	8.46679	7.01779	9.92917
Ambient	2	7.93295	10.7145	12.7308
Ambient	3	7.34425	8.67016	19.933
Ambient	4	9.8208	13.27	11.2524
Ambient	5	10.6878	15.4255	17.4043
Ambient	6	11.825	13.7918	21.1104
Ambient	7	8.54707	12.6412	14.6481
Ambient	8	10.8885	10.3934	16.267
Hypoxia	1	7.21447	6.91343	13.3343
Hypoxia	2	8.37046	6.75689	13.5952
Hypoxia	3	7.20644	8.66882	11.6899
Hypoxia	4	6.87062	9.52243	17.6117
Hypoxia	5	7.99851	16.7086	19.5049
Hypoxia	6	7.0887	11.9053	16.6149
Hypoxia	7	7.43657	10.942	12.9489
Hypoxia	8	7.83796	12.6144	11.7983
Anoxia	1	7.59177	13.7276	14.2481
Anoxia	2	8.70495	7.95302	10.0309
Anoxia	3	7.81253	5.37078	16.2149
Anoxia	4	8.35307	12.7817	10.0429
Anoxia	5	10.1392	7.7443	23.0237
Anoxia	6	10.5941	13.3771	17.6184
Anoxia	7	9.48363	10.9019	15.879
Anoxia	8	7.54361	14.8488	17.217

## Sheet: 5.Symbiodiniaceae and Chl
Symbiodiniaceae and Chl: Symbiodiniaceae cell, chlorophyll a, chlorophyll c2 measured in experiment for 3 species of corals, P. acuta, P. lutea and T. mesenterina
Symbiodiniaceae cell counting
Pocillopora	Initial	Ambient	Hypoxia	Anoxia			Porites	Initial	Ambient	Hypoxia	Anoxia			Turbinaria	Initial	Ambient	Hypoxia	Anoxia
R1	1.42083e+07	2.14583e+07	8375000	0			R1	1.87083e+07	1.90833e+07	1.41667e+07	20750000			R1	20200000	27250000	26100000	20250000
R2	1.67083e+07	25625000	1.39583e+07	0			R2	1.93333e+07	23625000	2.28333e+07	24500000			R2	2.185e+07	4.285e+07	2.645e+07	2.35e+07
R3	33250000	3.26667e+07	1.83333e+06	0			R3	8.08333e+06	15125000	1.92083e+07	12125000			R3	2.015e+07	29700000	3.02e+07	23250000
R4	2.93333e+07	1.19167e+07	3.95833e+06	0			R4	2.36667e+07	1.22917e+07	2.73333e+07	19625000			R4	36600000	2.14e+07	3.01e+07	2.59e+07
Chlorophyll a
Pocillopora	Initial (µg)	Ambient (µg)	Hypoxia (µg)	Anoxia (µg)			Porites	Initial (µg)	Ambient (µg)	Hypoxia (µg)	Anoxia (µg)			Turbinaria	Initial (µg)	Ambient (µg)	Hypoxia (µg)	Anoxia (µg)
R1	42.2318	43.7579	45.7435	33.719			R1	82.8051	76.1834	54.5256	56.9822			R1	61.9537	66.1457	3.61293	21.5387
R2	37.4314	Data missed	36.1799	51.2257			R2	79.7873	77.9369	65.1861	67.8329			R2	50.495	18.2603	9.14636	46.5237
R3	67.5701	Data missed	26.6324	27.927			R3	51.7855	41.7946	30.3394	49.7424			R3	58.6978	4.78201	17.3195	16.7713
R4	68.2958	Data missed	54.8515	29.3768			R4	17.354	59.7272	52.7471	76.1448			R4	43.5407	37.3662	20.4772	55.7392
Chlorophyll c2
Pocillopora	Initial (µg)	Ambient (µg)	Hypoxia (µg)	Anoxia (µg)			Porites	Initial (µg)	Ambient (µg)	Hypoxia (µg)	Anoxia (µg)			Turbinaria	Initial (µg)	Ambient(µg)	Hypoxia (µg)	Anoxia (µg)
R1	10.1574	14.3608	12.5639	9.77849			R1	45.6556	34.3021	21.9272	20.5433			R1	25.2904	29.6497	11.2333	21.9671
R2	8.91481	Data missed	11.6714	15.6891			R2	37.2382	40.8767	31.4795	32.6178			R2	21.5636	25.1384	16.9932	21.67
R3	19.7953	Data missed	6.44963	8.49233			R3	23.8168	18.5222	21.6297	12.7978			R3	18.5506	10.9432	22.4985	20.784
R4	19.4324	Data missed	15.7588	6.09314			R4	22.4879	27.1615	28.8914	34.5233			R4	18.473	19.2576	23.7585	26.3663

## Sheet: 6.Total alkalinity
Total alkalinity: total alkalinity measured in experiment for 3 species of corals, P. acuta, P. lutea and T. mesenterina
			Day1						Day1		Day2		Day3						Day1		Day2		Day3
Pocillopora	Treatment	Rep	Start-TA(mg L-1)	End-TA(mg L-1)		Porites	Treatment	Rep	Start-TA(mg L-1)	End-TA(mg L-1)	Start-TA(mg L-1)	End-TA(mg L-1)	Start-TA(mg L-1)	End-TA(mg L-1)		Turbinaria	Treatment	Rep	Start-TA(mg L-1)	End-TA(mg L-1)	Start-TA(mg L-1)	End-TA(mg L-1)	Start-TA(mg L-1)	End-TA(mg L-1)
	Ambient	1	56.2	56.2			Ambient	1	64.4	60.3	66.1	63.3	65.1	61.9			Ambient	1	61.1	60.6	59	58.4	59.9	58.9
	Ambient	2		56.2			Ambient	2		61.5		63.5		61.7			Ambient	2		59.7		58.9		58.6
	Ambient	3	58	56.3			Ambient	3	63.4	61.8	66.8	62.8	66.2	63.7			Ambient	3	61.2	59	59.1	59	59.9	57.8
	Ambient	4		56.8			Ambient	4		62.1		63.1		61.6			Ambient	4		60.6		57.9		59.3
	Ambient	5		56.9			Ambient	5		62.2		62.2		65			Ambient	5		59.8		58.2		59.1
	Ambient	6	56.6	55.1			Ambient	6	65.5	61.3	66.5	63.3	65.5	60.9			Ambient	6	60.2	59.3	59.3	57.8	60.6	58.7
	Ambient	7		56.1			Ambient	7		61		61		62.9			Ambient	7		59.4		57.6		59.7
	Ambient	8		56.4			Ambient	8		60.2		63.2		61.1			Ambient	8		59.6		58.2		58.6
	Hypoxia	1	56.9	57.9			Hypoxia	1	64.3	62.5	65.9	65.5	65.9	64.8			Hypoxia	1	59.6	62.6	58.8	59.7	62.2	64.1
	Hypoxia	2		56.3			Hypoxia	2		61.5		66.5		65.1			Hypoxia	2		58.6		60.8		63.4
	Hypoxia	3	56.5	57.3			Hypoxia	3	64.5	66.5	67.1	66.5	65.1	63.5			Hypoxia	3	59.4	61.7	60.9	61	60.4	62.6
	Hypoxia	4		55			Hypoxia	4		61		64		62.5			Hypoxia	4		59.9		61.3		63.5
	Hypoxia	5		54			Hypoxia	5		64.2		64.2		65.3			Hypoxia	5		58.2		61.1		61.4
	Hypoxia	6	54.9	55.1			Hypoxia	6	64.3	62.5	67	65.5	65	65.5			Hypoxia	6	62.6	59.5	59.1	60.3	61.4	62.5
	Hypoxia	7		55.4			Hypoxia	7		61.4		64.4		61.6			Hypoxia	7		59.8		59.3		61.9
	Hypoxia	8		55.4			Hypoxia	8		61.1		64.1		64.7			Hypoxia	8		60.1		59.2		63.3
	Anoxia	1	57.2	56.3			Anoxia	1	63.8	66.1	66.8	66.1	66.8	67.8			Anoxia	1	62.8	61.4	59.3	59.3	60.7	63.8
	Anoxia	2		57.9			Anoxia	2		64.5		66.5		66.5			Anoxia	2		61.2		60.1		62.8
	Anoxia	3	57	58.7			Anoxia	3	65.3	66.4	68.3	66.4	68.3	66.3			Anoxia	3	61.5	61.2	59.8	59.5	60.6	62.4
	Anoxia	4		58.1			Anoxia	4		65.4		65.4		65.5			Anoxia	4		61.6		60.9		63.4
	Anoxia	5		57.3			Anoxia	5		63.8		67.8		69.2			Anoxia	5		61.3		59.5		63.6
	Anoxia	6	58	58.7			Anoxia	6	65.5	61.8	65.4	66.8	65.4	66.1			Anoxia	6	62.5	61.6	60	60.5	61.1	61.9
	Anoxia	7		58.7			Anoxia	7		62.7		66.7		65.9			Anoxia	7		60.6		59.1		61.2
	Anoxia	8		58.3			Anoxia	8		63.1		66.1		68.5			Anoxia	8		61.5		59.8		61.8

## Sheet: 7.pH
Pocillopora acuta	Treatment	Rep	0h	12h		Porites lutea	Treatment	Rep	0h	12h	24h	36h	48h	60h		Turbinaria mesenterina	Treatment	Rep	0h	12h	24h	36h	48h	60h
	Ambient	1	8.139	8.035			Ambient	1	8.293	8.216	8.191	8.126	8.189	8.146			Ambient	1	8.188	8.192	8.168	8.117	8.14	8.068
	Ambient	2	8.132	8.044			Ambient	2	8.295	8.217	8.195	8.142	8.193	8.145			Ambient	2	8.186	8.189	8.181	8.113	8.136	8.068
	Ambient	3	8.138	8.023			Ambient	3	8.294	8.219	8.202	8.136	8.195	8.143			Ambient	3	8.187	8.188	8.169	8.115	8.129	8.067
	Ambient	4	8.135	8.034			Ambient	4	8.294	8.219	8.207	8.132	8.2	8.143			Ambient	4	8.19	8.19	8.175	8.115	8.152	8.07
	Ambient	5	8.13	8.035			Ambient	5	8.292	8.217	8.208	8.124	8.195	8.143			Ambient	5	8.188	8.186	8.16	8.115	8.134	8.062
	Ambient	6	8.121	8.036			Ambient	6	8.295	8.219	8.213	8.143	8.203	8.143			Ambient	6	8.189	8.186	8.164	8.111	8.131	8.067
	Ambient	7	8.129	8.029			Ambient	7	8.295	8.219	8.215	8.136	8.189	8.139			Ambient	7	8.184	8.186	8.174	8.109	8.135	8.063
	Ambient	8	8.134	8.028			Ambient	8	8.294	8.219	8.209	8.136	8.198	8.137			Ambient	8	8.186	8.187	8.127	8.12	8.133	8.073
	Hypoxia	1	8.144	8.089			Hypoxia	1	8.332	8.236	8.246	8.224	8.263	8.21			Hypoxia	1	8.234	8.97	8.207	8.165	8.111	8.155
	Hypoxia	2	8.142	8.089			Hypoxia	2	8.301	8.236	8.249	8.225	8.263	8.211			Hypoxia	2	8.234	8.197	8.205	8.164	8.106	8.155
	Hypoxia	3	8.151	8.088			Hypoxia	3	8.299	8.24	8.249	8.224	8.264	8.211			Hypoxia	3	8.235	8.197	8.203	8.164	8.11	8.154
	Hypoxia	4	8.148	8.089			Hypoxia	4	8.297	8.24	8.248	8.224	8.262	8.21			Hypoxia	4	8.236	8.197	8.201	8.102	8.159	8.086
	Hypoxia	5	8.142	8.088			Hypoxia	5	8.297	8.238	8.245	8.223	8.258	8.21			Hypoxia	5	8.221	8.231	8.198	8.105	8.174	8.086
	Hypoxia	6	8.138	8.089			Hypoxia	6	8.299	8.238	8.247	8.223	8.261	8.21			Hypoxia	6	8.234	8.235	8.2	8.106	8.165	8.086
	Hypoxia	7	8.128	8.086			Hypoxia	7	8.3	8.237	8.246	8.227	8.261	8.209			Hypoxia	7	8.243	8.233	8.2	8.108	8.171	8.085
	Hypoxia	8	8.125	8.085			Hypoxia	8	8.297	8.239	8.246	8.228	8.255	8.208			Hypoxia	8	8.237	8.235	8.194	8.108	8.165	8.086
	Anoxia	1	8.218	8.207			Anoxia	1	8.415	8.399	8.397	8.449	8.405	8.339			Anoxia	1	8.303	8.315	8.358	8.252	8.239	8.265
	Anoxia	2	8.22	8.211			Anoxia	2	8.417	8.404	8.398	8.451	8.413	8.351			Anoxia	2	8.303	8.317	8.358	8.249	8.241	8.265
	Anoxia	3	8.218	8.207			Anoxia	3	8.417	8.407	8.398	8.449	8.413	8.355			Anoxia	3	8.3	8.317	8.358	8.251	8.249	8.265
	Anoxia	4	8.228	8.205			Anoxia	4	8.423	8.408	8.389	8.46	8.411	8.357			Anoxia	4	8.303	8.319	8.356	8.25	8.249	8.266
	Anoxia	5	8.226	8.207			Anoxia	5	8.421	8.41	8.398	8.473	8.412	8.357			Anoxia	5	8.303	8.318	8.354	8.249	8.317	8.261
	Anoxia	6	8.225	8.207			Anoxia	6	8.426	8.411	8.397	8.483	8.412	8.355			Anoxia	6	8.303	8.318	8.355	8.248	8.318	8.268
	Anoxia	7	8.216	8.214			Anoxia	7	8.424	8.413	8.396	8.482	8.411	8.356			Anoxia	7	8.304	8.356	8.355	8.247	8.318	8.268
	Anoxia	8	8.214	8.212			Anoxia	8	8.427	8.414	8.397	8.489	8.415	8.357			Anoxia	8	8.304	8.355	8.352	8.248	8.314	8.267
